# Supplementary material for: One-pot production of 2,5-dimethylfuran from fructose over Ru/C and a Lewis–Brønsted acid mixture in N,N-dimethylformamide
Source: Royal Society of Chemistry journal article supplement (doi:10.1039/c6cy00275g), 2016-01-01
Supplement: c6cy00275g1.pdf [file c6cy00275g1.pdf]

Supporting Material

**One-pot production of 2,5-dimethylfuran from fructose over Ru/C  
and Lewis-Brønsted acid mixture in N,N-dimethyl-formamide**

Zuojun Wei,<sup>a</sup>Jiongtao Lou<sup>a</sup>Zhenbin Li<sup>b</sup> and Yingxin Liu<sup>\*b</sup>

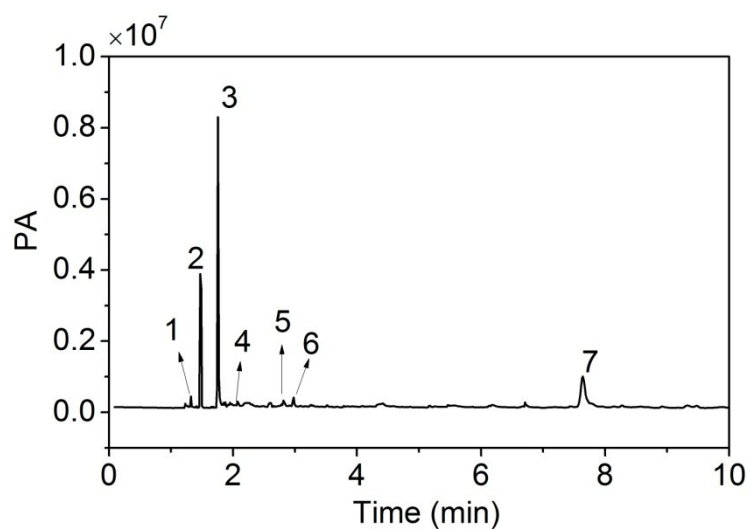

**Fig. S1** TIC spectra of the hydrogenolysis products of 5-HMF. 1: 2-methyl furan (2-MF). 2: 2,5-dimethylfuran (2,5-DMF). 3: N,N-Dimethylformamide. 4: Furfuryl Alcohol (FA). 5: 5-methylfurfuryl alcohol (MFA). 6: 5-Methylfurfural (5-MF). 7: 5-hydromethyl furfural (5-HMF)

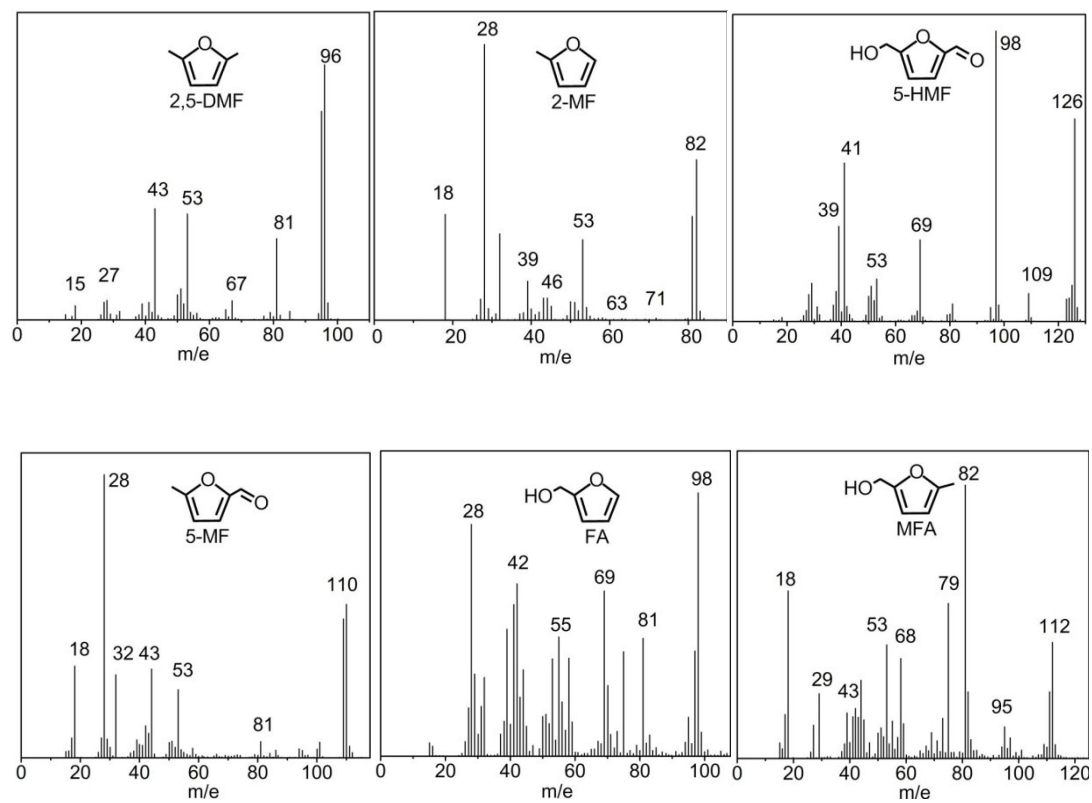

**Fig. S2** Mass spectra of the hydrogenolysis products of 5-HMF
